# Supplementary material for: In vivo evaluation of a polyester and fiberglass composite intramedullary nail for femoral osteosynthesis in calves
Source: PeerJ. 2024 Feb 8;12:e16656. doi: 10.7717/peerj.16656 (PMC10859077; doi:10.7717/peerj.16656)
Supplement: Supplemental Information 1 [file peerj-12-16656-s001.xlsx]

## Sheet: Biopsy Histology
30 days
Calf	Grade
1	1
3	9
4	8
5	10
7	8
60 days
Calf	Grade
1	9
3	10
4	10
5	10
7	10

## Sheet: Clinical evaluation 
Calf	Day	Time	Heart rate	Resp rate	Temperature	CRT	Mucosa	Rumen Mov
1	Basal		60	18	38.8	2	Normo	6 MR 5MIN
1	2017-07-12	11:50:00	68	32	38.8	2	HIPO	6 MR 5MIN
1	2017-07-12	18:26:00	66	30	38.9	4	HIPO	6 MR 5MIN
1	2017-07-13	09:05:00	72	36	37.5	3	HIPO	4MR 5MIN
1	2017-07-13	19:45:00	64	24	40.2	3	NORMO	4MR 5MIN
1	2017-07-17	09:10:00	68	32	39.5	3	HIPO	6MR 5MIN
1	2017-07-14	17:19:00	81	32	40.2	2	NORMO	6MR 3MIN
1	2017-07-15	09:22:00	76	39	38.2	3	NORMO	4MR 3MIN
1	2017-07-15	18:00:00	68	44	39.3	3	NORMO	3MR 3MIN
1	2017-07-16	09:40:00	52	44	39.5	2	HIPO	2 EM 3
1	2017-07-16	18:13:00	80	44	39.2	2	HIPO	4 EM 3
1	2017-07-17	09:20:00	80	40	39.1	2	HIPO	3 EM 3
1	2017-07-17	18:30:00	80	28	39.6	3	HIPO	2 EM 3
1	2017-07-18	09:10:00	64	40	39.1	2	HIPO	3 EM 3
1	2017-07-18	16:55:00	74	40	38.6	2	NORMO	3 EM 3
1	2017-07-19	08:20:00	72	40	38.9	2	NORMO	3 EM 3
1	2017-07-19	16:50:00	52	60	39.4	2	NORMO	2 EM 3
1	2017-07-20	16:50:00	84	52	39.8	3	HIPO	2 EM 3
1	2017-07-21	11:15:00	72	24	39.5	3	HIPO	3 EM 3
1	2017-07-22	10:55:00	80	48	39.8	3	NORMO
1	2017-07-22	18:20:00	108	48	40.2	3	NORMO	2 EM 3
1	2017-07-23	10:15:00	78	52	39.5	2	HIPO	3 EM 3
1	2017-07-24	09:00:00	98	38	39.8	2	NORMO	4 EM 3
1	2017-07-25	09:10:00	100	44	39.3	3	NORMO	2 EM 3
1	2017-07-26	09:00:00	106	30	39.0	2	NORMO	3 EM 3
1	2017-07-27	09:25:00	118	40	38.6	2	NORMO	2 EM 3
1	2017-07-28	09:35:00	80	32	38.8	2	NORMO	3 EM 3
1	2017-07-29	10:00:00	80	32	39.1	2	NORMO	3 EM 3
1	2017-07-30	09:10:00	72	40	38.8	2	NORMO	2 EM 3
1	2017-07-31	09:00:00	100	32	38.9	3	NORMO	2 EM 3
1	2017-08-01		89	36	38.6	2	NORMO	2 EM 3
1	2017-08-02	08:20:00	84	28	38.6	3	HIPO	2 EM 3
1	2017-08-03	08:20:00	72	24	38.8	2	NORMO	2 EM 3
1	2017-08-04	08:14:00	88	22	39.1	2	NORMO	3 EM 3
1	2017-08-05	09:20:00	88	32	39.1	3	NORMO	3 EM 3
1	2017-08-06	10:44:00	60	32	38.9	2	NORMO	1 EM 3
1	2017-08-07	09:30:00	116	40	38.9	2		3 EM 3
1	2017-08-08	09:40:00	110	30	39.5	2	NORMO	2 EM 3
1	2017-08-09	08:40:00	72	32	39.4	2	HIPER
1	2017-08-10	09:30:00	88	46	39.3	2	NORMO	2 EM 3
1	2017-08-11	11:30:00	88	48	39.1	3	NORMO	2 EM 3
1	2017-08-12	09:20:00	44	32	39.1	2	NORMO	2 EM 2
1	2017-08-13	08:30:00	80	44	39.1	2	HIPER	3 EM 3
1	2017-08-14
1	2017-08-15		60	44	38.6	3	HIPO	4 EM 3
1	2017-08-16	08:50:00	80	64	38.8	2	NORMO	2 EM 2
1	2017-08-17	12:00:00	80	42	39.5	3	NORMO	3 EM 3
1	2017-08-18	09:35:00	80	42	38.9	2	NORMO	3 EM 3
1	2017-08-19		92	72	39.6	2	HIPER	2 EM 3
1	2017-08-20		80	64	38.9	2	NORMO	2 EM 3
1	2017-08-21	09:20:00	82	40	39.0	2	NORMO	3 EM 3
1	2017-08-22	09:30:00	70	48	38.7	1	NORMO	3 EM 3
1	2017-08-23	09:30:00	116	36	38.5	2	NORMO	1 EM 3
1	2017-08-24	09:45:00	84	34	38.9	3	NORMO	4 EM 3
1	2017-08-25	09:25:00	88	44	38.8	2	NORMO	4 EM 3
1	2017-08-26		104	40	38.3	2	NORMO	3 EM 3
1	2017-08-27	09:50:00	60	40	38.8	2	NORMO	3 EM 3
1	2017-08-28	09:15:00	104	48	39.5	1	NORMO	3 EM 3
1	2017-08-29	09:30:00	110	38	39.1	3	NORMO	3 EM 3
1	2017-08-30	09:30:00	94	34	39.4	2	NORMO	2 EM 3
1	2017-08-31	09:30:00	90	30	38.8	2	NORMO	3 EM 3
1	2017-09-01		82	38	38.9	1	NORMO	3 EM 3
1	2017-09-02		88	44	38.9	1	HIPER	2 EM 3
1	2017-09-03
1	2017-09-04	09:00:00	86	42	39.0	2	NORMO	3 EM 3
1	2017-09-05	10:05:00	52	42	38.7	2	NORMO	3 EM 3
1	2017-09-06	10:20:00	114	40	38.8	2	NORMO	3 EM 3
1	2017-09-07	08:00:00	104	44	38.9	3	HIPER	3 EM 3
1	2017-09-08	09:45:00	60	52	38.6	2	NORMO	4 EM 3
1	2017-09-09	09:50:00	98	48	38.6	2	NORMO	2 EM 3
1	2017-09-10		60	40	38.5	2	NORMO	2 EM 3
1	2017-09-11		82	36	38.9	3	NORMO	3 EM 3
1	2017-09-12		88	60	38.1	2	NORMO	2 EM 3
1	2017-09-13	12:53:00	82	56	38.6	2	NORMO	3 EM 3
1	2017-09-14
1	2017-09-15		60	64	38.7	3	NORMO	3 EM 3
2	Basal		56	21	38	2	Normo	4 EM 5
2	2017-07-12	11:50:00	79	21	38.5	1	NORMO	4 EM 5
2	2017-07-12	18:35:00	52	40	38.6	3	HIPO	5 EM 5
2	2017-07-13	09:10:00	72	40	38.8	3	NORMO	7 EM 5
2	2017-07-13	19:45:00	52	48	38.3	3	HIPO	6 EM 3
2	2017-07-14	09:00:00	72	48	38.1	3	NORMO	3 EM 3
2	2017-07-14	16:54:00	100	48	38.3	2	NORMO	4 EM 3
2	2017-07-15	09:34:00	76	44	38.9	3	NORMO	6 EM 3
2	2017-07-15	18:00:00	80	40	38.7	2	NORMO	5 EM 3
2	2017-07-16	09:20:00	96	40	38.9	2	NORMO	5 EM 3
2	2017-07-16	18:16:00	96	36	38.4	2	NORMO	4 EM 3
2	2017-07-17	08:59:00	80	44	39.0	3	NORMO	2 EM 3
2	2017-07-17	18:39:00	86	44	38.6	2	NORMO	2 EM 3
2	2017-07-18	09:40:00	76	36	38.8	3	NORMO	3 EM 3
2	2017-07-18	16:40:00	52	40	39.9	3	HIPO	3 EM 3
2	2017-07-19	08:40:00	76	44	39.6	3	NORMO	3 EM 3
2	2017-07-19	16:20:00	76	52	39.3	3	NORMO	3 EM 3
2	2017-07-20	17:00:00	80	36	39.6	2	NORMO	1 EM 3
2	2017-07-21	09:40:00	96	48	39.5	2	NORMO	3 EM 3
2	2017-07-23	10:35:00	60	40	39.5	2	NORMO	2 EM 3
2	2017-07-24	09:30:00	64	48	39.3	2	NORMO	4 EM 3
2	2017-07-25	09:20:00	92	52	39.1	3	NORMO	2 EM 3
2	2017-07-26	09:35:00	88	50	39.0	3	NORMO	3 EM 3
2	2017-07-27	09:00:00	922	60	38.9	2	NORMO	3 EM 3
2	2017-07-28	09:10:00	108	42	38.6	3	NORMO	2 EM3
2	2017-07-29	10:00:00	88	32	38.9	CA	NORMO	3 EM 3
2	2017-07-30	08:45:00	52	40	38.8	3	NORMO	3 EM 3
2	2017-07-31	09:30:00	96	44	39.2	2	NORMO	4 EM 3
2	2017-08-01	07:40:00	80	40	38.8	1	NORMO	3 EM 3
2	2017-08-02	08:20:00	108	40	37.9	1	NORMO	4 EM 3
2	2017-08-03		98	40	38.6	2	NORMO	3 EM 3
2	2017-08-04	08:30:00	112	40	38.1	1	NORMO	4 EM 3
2	2017-08-05	09:20:00	88	36	38.8	2	NORMO	3 EM 3
2	2017-08-06	10:33:00	88	32	38.7	2	NORMO	4 EM 3
2	2017-08-07	09:00:00	100	60	37.8	2	NORMO	3 EM 3
2	2017-08-08	09:05:00	96	44	38.1	3	NORMO	3 EM 3
2	2017-08-09	07:50:00	124	60	38.2	2	NORMO	3 EM 3
2	2017-08-10	09:00:00	88	48	39.0	2	NORMO	4 EM 3
2	2017-08-11		36	36	38.8	2	NORMO	3 EM 3
2	2017-08-12	10:10:00	60	40	38.8	2	NORMO	2 EM 3
2	2017-08-13	08:40:00	84	40	39.1	3	NORMO	3 EM 3
2	2017-08-14	09:40:00	84	36	38.6	2	NORMO	4 EM 3
2	2017-08-15		58	42	38.8	2	NORMO	2 EM 3
2	2017-08-16	09:35:00	88	50	38.5	2	NORMO	1 EM 3
2	2017-08-17	12:00:00	82	52	37.9	2	NORMO	3 EM 3
2	2017-08-18	08:30:00	100	58	38.8	2	NORMO	3 EM 3
2	2017-08-19	12:32:00	94	50	39.6	2	NORMO	2 EM 3
2	2017-08-20		100	50	38.6	2	NORMO	3 EM 3
2	2017-08-21	08:50:00	88	44	39.0	2	NORMO	3 EM 3
2	2017-08-22	08:40:00	108	40	38.4	2	NORMO	4 EM 3
2	2017-08-23	09:10:00	118	34	37.5	2	NORMO	3 EM 3
2	2017-08-24	09:00:00	70	40	39.0	2	NORMO	3 EM 3
2	2017-08-25	09:05:00	98	32	38.7	3	NORMO	4 EM 3
2	2017-08-26	20:00:00	62	36	38.6	2	NORMO	5 EM 3
2	2017-08-27	20:00:00	60	36	38.8	2	NORMO	3 EM 3
2	2017-08-28	08:45:00	86	40	38.9	3	NORMO	3 EM 3
2	2017-08-29	09:20:00	94	44	38.8	2	NORMO	3 EM 3
2	2017-08-30	08:55:00	80	36	38.6	2	NORMO	4 EM 3
2	2017-08-31	09:10:00	90	40	38.4	2	NORMO	3 EM 3
2	2017-09-01		72	40	38.6	2	NORMO	3 EM 3
2	2017-09-02		72	32	38.0	2	NORMO	3 EM 3
2	2017-09-03
2	2017-09-04	09:10:00	98	36	38.7	2	NORMO	4 EM 5
2	2017-09-05	09:15:00	84	48	38.6	2	NORMO	2 EM 3
2	2017-09-06	09:30:00	98	40	38.8	2	NORMO	2 EM 3
2	2017-09-07	08:00:00	92	40	38.8	2	NORMO	2 EM 3
2	2017-09-08	09:05:00	98	44	38.9	3	NORMO	3 EM 3
2	2017-09-09	09:10:00	98	46	38.8	2	NORMO	2 EM 3
2	2017-09-10		80	46	38.8	2	NORMO	3 EM 3
2	2017-09-11		68	32	39.0	2	NORMO	4 EM 3
2	2017-09-12		86	40	38.4	2	NORMO	5 EM 3
2	2017-09-13		104	44	38.7	2	NORMO	3 EM 3
2	2017-09-14
2	2017-09-15		96	40	38.7	2	NORMO	4 EM 3
3	Basal		64	18	36.8	2	NORMO	5 EM 3
3	2017-07-13	19:45:00	92	20	38.0	2	HIPO	5 EM 3
3	2017-07-14	09:00:00	76	20	38.8	1	NORMO	4 EM 3
3	2017-07-14	17:00:00	92	20	38.9	2	HIPO	5 EM 5
3	2017-07-15	09:04:00	84	23	38.1	2	HIPO	1 EM 3
3	2017-07-15	18:00:00	92	24	38.5	3	HIPO	3 EM 3
3	2017-07-16	09:20:00	84	24	38.1	2	HIPO	3 EM 3
3	2017-07-16	18:05:00	98	18	39.3	2	HIPO	5 EM 3
3	2017-07-17	09:10:00	90	26	38.9	2	NORMO	2 EM 3
3	2017-07-17		104	44	38.6	3	HIPO	1 EM 5
3	2017-07-18	09:20:00	100	20	38.9	3	HIPO	3 EM 3
3	2017-07-18		86	27	39.5	3		5 EM 3
3	2017-07-19		100	20	38.8	2		2 EM 3
3	2017-07-19		136	40	39.3	2	NORMO	2 EM 3
3	2017-07-20	17:00:00	108	28	39.3	2	HIPO	4 EM 3
3	2017-07-21	11:00:00	52	28	38.5	2	HIPO	3 EM 3
3	2017-07-22	10:55:00	84	48	38.6	2	NORMO	3 EM 3
3	2017-07-23	10:50:00	52	24	39.3	2	HIPO	3 EM 3
3	2017-07-24	09:50:00	70	30	38.5	2	HIPO	2 EM 3
3	2017-07-25	09:30:00	96	20	38.6	3	NORMO	2 EM 3
3	2017-07-26	10:10:00	96	56	38.8	3	NORMO	2 EM 3
3	2017-07-27	10:00:00	80	20	38.5	3	HIPO	1 EM 3
3	2017-07-28	10:00:00	116	48	38.9	3	NORMO	2 EM 3
3	2017-07-29	10:00:00	68	24	38.5	3	HIPO	1 EM 3
3	2017-07-30	09:00:00	44	24	38.7	2	HIPO	3 EM 3
3	2017-07-31	09:20:00	60	28	38.5	2	NORMO	3 EM 3
3	2017-08-01	07:30:00	84	28	38.7	2	NORMO	2 EM 3
3	2017-08-02	07:40:00	72	20	38.6	3	HIPO	3 EM 3
3	2017-08-03	08:10:00	84	40	38.7	2	NORMO	3 EM 3
3	2017-08-04	08:20:00	72	28	38.8	2	NORMO	4 EM 3
3	2017-08-05	09:30:00	60	28	38.2	2	NORMO	2 EM 3
3	2017-08-06	10:00:00	48	24	38.3	2	NORMO	4 EM 3
3	2017-08-07	09:00:00	72	24	37.1	1	NORMO	3 EM 3
3	2017-08-08	09:20:00	52	30	38.4	2	NORMO	3 EM 3
3	2017-08-09	08:30:00	64	38	37.8	2	NORMO	3 EM 3
3	2017-08-10	10:00:00	70	36	38.2	3	NORMO	3 EM 3
3	2017-08-11	11:30:00	84	40	38.8	2	NORMO	3 EM 3
3	2018-08-12	09:45:00	60	40	38.2	2	NORMO	4 EM 3
3	2017-08-13	09:30:00	60	32	38.5	2	NORMO	3 EM 3
3	2017-08-14	09:40:00	80	36	38.6	2	NORMO	3 EM 3
3	2017-08-15		104	28	39.0	3	HIPO	3 EM 3
3	2017-08-16	09:25:00	94	34	39.0	2	NORMO	3 EM 3
3	2017-08-17	12:00:00	82	28	38.6	2	NORMO
3	2017-08-18	09:05:00	100	30	38.5	2	NORMO	3 EM 3
3	2017-08-19		80	60	38.9	2	NORMO	1 EM 3
3	2017-08-20	10:00:00	72	28	38.7	2	NORMO	2 EM 3
3	2017-08-21	10:10:00	100	60	38.8	2	NORMO	2 EM 3
3	2017-08-22	10:00:00	100	34	38.4	2	NORMO	2 EM 3
3	2017-08-23	09:55:00	86	30	38.4	2	NORMO	2 EM 3
3	2017-08-24	10:00:00	86	34	38.6	2	NORMO	3 EM 3
3	2017-08-25	09:55:00	92	34	38.4	2	NORMO	1 EM 3
3	2017-08-26		80	40	37.8	2	NORMO	2 EM 3
3	2017-08-27	09:30:00	56	32	38.3	2	NORMO	2 EM 3
3	2017-08-28		72	36	38.0	2	NORMO	2 EM 3
3	2017-08-29	10:10:00	74	32	38.1	2	NORMO	3 EM 3
3	2017-08-30	10:00:00	64	38	38.3	2	NORMO	4 EM 3
3	2017-08-31	10:00:00	60	30	38.2	2	NORMO	1 EM 3
3	2017-09-01		62	30	38.3	2	NORMO	4 EM 3
3	2017-09-02		72	21	37.9	2	NORMO	2 EM 3
3	2017-09-03
3	2017-09-04	09:10:00	78	46	38.2	2	HIPO	4 EM 5
3	2017-09-05	09:45:00	80	22	38.5	2	NORMO	1 EM 5
3	2017-09-06	10:30:00	70	28	38.4	2	NORMO	1 EM 3
3	2017-09-07	08:00:00	96	28	38.0	1	NORMO	1 EM 3
3	2017-09-08	10:15:00	86	40	38.5	2	NORMO	1 EM 3
3	2017-09-09	09:15:00	84	36	38.3	2	NORMO	2 EM 3
3	2017-09-10		60	26	38.4	2	NORMO	2 EM 3
3	2017-09-11		64	28	38.7	2	HIPO	2 EM 3
3	2017-09-12		90	30	38.9	2	NORMO
3	2017-09-13		72	38	38.6	2	NORMO	3 EM 3
3	2017-09-14
3	2017-09-15		100	32	38.7	2	NORMO	3 EM 3
4	Basal		62	15	38.7	2	NORMO	5 EM 3
4	2017-07-12	11:50:00	87	39	38.5	1	NORMO	5 EM 3
4	2017-07-12	18:30:00	40	27	39.5	2	HIPO	4 EM 3
4	2017-07-13	09:05:00	48	44	37.8	3	NORMO	5 EM 3
4	2017-07-13	19:45:00	72	64	39.0	2	NORMO	5 EM 3
4	2017-07-14	08:44:00	88	29	37.8	2	NORMO	4 EM 3
4	2017-07-14	16:56:00	84	38	39.4	3	HIPER	5 EM 3
4	2017-07-15	08:49:00	84	42	38.5	3	NORMO	3 EM 3
4	2017-07-15	17:47:00	80	48	39.2	2	NORMO	4 EM 3
4	2017-07-16	09:40:00	104	64	38.9	2	NORMO	3 EM 3
4	2017-07-16	18:13:00	92	44	38.9	2	NORMO	4 EM 3
4	2017-07-17	08:48:00	92	32	38.5	2	NORMO	3 EM 3
4	2017-07-17	18:30:00	88	42	39.1	2	NORMO	3 EM 3
4	2017-07-18	09:30:00	60	68	39.0	2	NORMO	2 EM 3
4	2017-07-18	16:40:00	80	32	39.4	3	NORMO	5 EM 3
4	2017-07-19	09:15:00	84	58	38.7	2	NORMO	3 EM 3
4	2017-07-19	16:40:00	52	40	38.9	2	NORMO	3 EM 3
4	2017-07-20	17:30:00	88	44	39.3	2	HIPO	4 EM 3
4	2017-07-21	09:45:00	92	48	38.8	2	NORMO	2 EM 3
4	2017-07-22	10:55:00	80	48	39.0	2	NORMO	3 EM 3
4	2017-07-23	10:25:00	48	32	38.1	2	HIPO	2 EM 3
4	2017-07-24	09:35:00	82	42	38.8	2	HIPER	2 EM 3
4	2017-07-25	09:00:00	92	52	38.8	2	NORMO	3 EM 3
4	2017-07-26	09:45:00	80	32	39.0	3	NORMO	2 EM 3
4	2017-07-27	09:14:00	86	28	39.3	3	NORMO	2 EM 3
4	2017-07-28	09:25:00	116	40	39.1	3	NORMO	1 EM 3
4	2017-07-29	10:00:00	72	44	39.0	2	NORMO	2 EM 3
4	2017-07-30	08:50:00	60	40	38.1	2	HIPO	2 EM 3
4	2017-08-31	07:30:00	72	32	39.0	2	NORMO	2 EM 3
4	2017-08-01	08:00:00	84	56	38.3	2	NORMO	4 EM 3
4	2017-08-02	08:00:00	88	40	38.6	2	NORMO	3 EM 3
4	2017-08-03	08:15:00	108	44	39.0	1	NORMO	3 EM 3
4	2017-08-04		80	48	38.1	2	HIPER	2 EM 3
4	2017-08-05	09:00:00	94	32	39.1	2	NORMO	2 EM 3
4	2017-08-06	10:20:00	92	48	38.7	2	NORMO	3 EM 3
4	2017-08-07	09:10:00	98	40	38.7	2	NORMO	3 EM 3
4	2017-08-08	08:55:00	88	38	38.7	2	NORMO	2 EM 3
4	2017-08-09	08:15:00	98	48	37.9	2	HIPO
4	2017-08-10	09:15:00	114	40	38.6	2	NORMO	2 EM 3
4	2017-08-11		98	36	38.8	2	NORMO
4	2017-08-12	10:00:00	48	44	38.8	2	NORMO	3 EM 3
4	2017-08-13	09:10:00	88	48	39.2	2	NORMO	4 EM 3
4	2017-08-14	09:30:00	120	40	38.2	3	HIPER	3 EM 3
4	2017-08-15		76	44	38.4	2	NORMO	2 EM 3
4	2017-08-16	09:45:00	86	34	38.6	1	HIPER	2 EM 3
4	2017-08-17	12:00:00	80	52	38.7	2	NORMO	5 EM 3
4	2017-08-18	08:40:00	90	54	38.8	2	NORMO	2 EM 3
4	2017-08-19	12:39:00	94	48	38.7	2	NORMO	2 EM 3
4	2017-08-20	10:20:00	52	28	38.6	2	NORMO	3 EM 3
4	2017-08-21	09:00:00	88	40	38.8	3	NORMO	2 EM 3
4	2017-08-22	08:45:00	82	50	38.4	2	NORMO	3 EM 3
4	2017-08-23	08:45:00	74	32	38.4	2	NORMO	4 EM 3
4	2017-08-24	09:05:00	62	38	38.4	2	NORMO	2 EM 3
4	2017-08-25	08:55:00	94	46	38.8	3	NORMO	2 EM 3
4	2017-08-26	10:00:00	64	40	38.1	3	NORMO	2 EM 3
4	2017-08-27	10:00:00	64	36	38.3	2	NORMO	2 EM 3
4	2017-08-28	08:55:00	106	50	38.7	2	NORMO	2 EM 3
4	2017-08-29	09:10:00	84	36	38.3	2	NORMO	3 EM 3
4	2017-08-30	08:45:00	90	38	38.5	3	NORMO	4 EM 3
4	2017-08-31	09:20:00	80	44	38.8	1	NORMO	2 EM 3
4	2017-09-01		68	34	38.4	2	NORMO	3 EM 3
4	2017-09-02		84	48	37.9	3	NORMO	3 EM 3
4	2017-09-03
4	2017-09-04	09:00:00	92	54	38.9	2	NORMO	4 EM 3
4	2017-09-05	09:35:00	92	52	38.7	2	NORMO	3 EM 3
4	2017-09-06	09:40:00	118	40	38.7	2	NORMO	3 EM 3
4	2017-09-07	08:00:00	88	56	38.6	2	NORMO	3 EM 3
4	2017-09-08	09:15:00	102	48	38.7	2	NORMO	2 EM 3
4	2017-09-09	09:15:00	98	48	38.8	2	NORMO	3 EM 3
4	2017-09-10		98	40	38.4	2	NORMO	2 EM 3
4	2017-09-11		82	40	39.2	2	NORMO	3 EM 3
4	2017-09-12		86	70	38.2	2	NORMO	2 EM 3
4	2017-09-13		100	46	38.4	2	NORMO	2 EM 3
4	2017-09-14
4	2017-09-15		100	52	38.6	2	NORMO	3 EM 3
5	Basal		50	16	38.1	2	NORMO	2 EM 3
5	2017-08-12	09:30:00	72	44	39.0	3	HIPO	2 EM 3
5	2017-08-13	08:30:00	104	32	38.3	2	ICTERICA	2 EM 3
5	2017-08-14	09:00:00	124	60	39.0	2	ICTERICA	3 EM 3
5	2017-08-15		60	44	38.6	3	HIPO	4 EM 3
5	2017-08-16	09:15:00	80	34	38.8	2	NORMO	4 EM 3
5	2017-08-17	12:00:00	82	42	39.2	2	NORMO	5 EM 3
5	2017-08-18	09:50:00	84	34	38.4	2	NORMO	4 EM 3
5	2017-08-19		84	40	38.3	2	NORMO	3 EM 3
5	2017-08-20	10:45:00	80	32	38.3	2	NORMO	3 EM 3
5	2017-08-21	09:25:00	84	34	38.5	2	NORMO	3 EM 3
5	2017-08-22	09:35:00	86	38	38.5	2	NORMO	3 EM3
5	2017-08-23	09:40:00	92	32	38.6	2	NORMO	4 EM 3
5	2017-08-24	09:20:00	86	48	38.5	2	NORMO	3 EM 3
5	2017-08-25	09:35:00	88	34	38.3	2	NORMO	1 EM 3
5	2017-08-26		80	36	37.8	3	NORMO	4 EM 3
5	2017-08-27	09:40:00	60	40	38.6	2	NORMO	3 EM 3
5	2017-08-28	09:35:00	96	48	38.7	2	NORMO	2 EM 3
5	2017-08-29	09:40:00	86	32	38.5	2	NORMO	2 EM 3
5	2017-08-30	09:50:00	84	40	38.3	2	NORMO	4 EM 3
5	2017-08-31	09:40:00	78	44	38.3	2	NORMO	2 EM 3
5	2017-09-01		72	32	38.4	2	NORMO	2 EM 3
5	2017-09-02		76	44	38.9	3	NORMO	2 EM 3
5	2017-09-03
5	2017-09-04	09:00:00	62	41	38.5	2	NORMO	2 EM 3
5	2017-09-05	10:25:00	82	46	38.3	2	NORMO	4 EM 3
5	2017-09-06	10:00:00	98	38	38.3	2	NORMO	4 EM 3
5	2017-09-07	08:00:00	100	48	38.6	1	NORMO	2 EM 3
5	2017-09-08	09:35:00	112	46	38.5	2	NORMO	4 EM 3
5	2017-09-09	09:40:00	108	48	38.3	2	NORMO	3 EM 3
5	2017-09-10		88	46	39.7	2	NORMO	2 EM 3
5	2017-09-11		112	56	39.6	2	NORMO	3 EM 3
5	2017-09-12		120	48	39.3	2	NORMO	2 EM 3
5	2017-09-13		134	56	39.3	2	NORMO	5 EM 3
5	2017-09-14
5	2017-09-15		150	50	39.3	3	HIPO	3 EM 3
5	2017-09-16		120	56	38.8	2	NORMO
5	2017-09-17		120	52	38.5	2	HIPO	3 EM 3
6	Basal	0.784722	68	28	38.6	2	NORMO	5 MR
6	2017-07-13	09:36:00	68	32	38.3	3	NORMO	11 MR
6	2017-07-13	19:45:00	68	40	38.9	2	NORMO	6 EM 3
6	2017-07-14	09:00:00	68	32	37.8	3	NORMO	5 EM 3
6	2017-07-14	17:11:00	88	39	38.9	3	NORMO	1 EM 3
6	2017-07-15	09:35:00	64	40	37.9	3	HIPER	4 EM 3
6	2017-07-15	18:00:00	80	36	39.1	3	NORMO	4 EM 3
6	2017-07-16	09:32:00	64	40	38.7	2	NORMO	4 EM 3
6	2017-07-16	18:17:00	64	30	28.7	2	NORMO	5 EM 3
6	2017-07-17	09:45:00	60	36	38.5	2	NORMO	3 EM 3
6	2017-07-17	18:30:00	68	56	36.6	3	NORMO	3 EM 3
6	2017-07-18	09:20:00	64	28	38.6	3	NORMO	3 EM 3
6	2017-07-18	18:45:00	84	60	39.4	2	NORMO	3 EM3
6	2017-07-19	08:44:00	56	40	38.0	3	NORMO	4 EM 3
6	2017-07-19	17:03:00	64	40	39.6	2	NORMO	3 EM 3
6	2017-07-20	16:30:00	80	72	39.5	2	HIPO	4 EM 3
6	2017-07-21	10:00:00	68	36	38.5	3	NORMO	2 EM 3
6	2017-07-22	11:00:00	72	52	39.0	3	NORMO	3 EM 3
6	2017-07-23		64	52	38.5	3	NORMO	4 EM 3
6	2017-07-24	09:00:00	80	28	38.8	2	NORMO	4 EM 3
6	2017-07-25	09:00:00	70	46	38.9	2	NORMO	4 EM 3
6	2017-07-26	09:20:00	74	40	38.7	3	NORMO	4 EM 3
6	2017-07-27	09:45:00	100	44	39.0	2	NORMO	2 EM 3
6	2017-07-28	09:50:00	72	40	38.9	3	NORMO	2 EM 3
6	2017-07-29	10:00:00	72	32	38.9	3	NORMO	3 EM 3
6	2017-07-30	09:20:00	80	36	38.8	3	NORMO	4 EM 3
6	2017-07-31	09:10:00	78	40	38.8	2	NORMO	3 EM 3
6	2017-08-01	08:00:00	84	32	38.6	2	NORMO	4 EM 3
6	2017-08-02	08:30:00	84	32	38.6	2	NORMO	3 EM 3
6	2017-08-03	08:30:00	68	40	37.8	2	NORMO	2 EM 3
6	2017-08-04	08:00:00	64	40	38.1	2	NORMO	3 EM 3
6
6	2017-08-06	10:45:00	80	40	39.0	3	NORMO	3 EM 3
6	2017-08-07	09:20:00	88	40	38.9	2	HIPO	3 EM 3
6	2017-08-08		86	48	39.0	2	NORMO	3 EM 3
6	2017-08-09	08:10:00	86	50	38.8	3	HIPER	3 EM3
6	2017-08-10	09:45:00	98	60	38.6	2	NORMO	3 EM 3
6	2017-08-11		80	42	38.6	2	NORMO	4 EM 3
6	2017-08-12	09:40:00	48	40	38.6	2	NORMO	4 EM 3
6	2017-08-13	08:40:00	84	36	38.7	3	NORMO	3 EM 3
6	2017-08-14
6	2017-08-15		96	28	38.5	2	NORMO	3 EM 3
6	2017-08-16	09:05:00	80	46	38.8	2	NORMO	4 EM 3
6	2017-08-17	12:00:00	76	42	39.5	2	NORMO	4 EM 3
6	2017-08-18	09:25:00	82	36	38.8	2	NORMO	2 EM 3
6	2017-08-19		104	80	39.5	3	NORMO	2 EM 3
6	2017-08-20	11:00:00	60	36	39.0	2	NORMO
6	2017-08-21	09:30:00	84	56	38.8	2	NORMO	4 EM 3
6	2017-08-22	09:15:00	70	38	38.5	2	NORMO	3 EM 3
6	2017-08-23	09:45:00	104	46	38.9	3	NORMO	3 EM 3
6	2017-08-24	09:35:00	90	64	38.5	2	NORMO	3 EM 3
6	2017-08-25	09:45:00	86	52	38.7	1	NORMO	3 EM 3
6	2017-08-26
6	2017-08-27	09:45:00	52	40	38.6	2	NORMO	3 EM 3
6	2017-08-28	09:25:00	86	46	38.8	1	NORMO	3 EM 3
6	2017-08-29	09:50:00	76	46	38.5	1	HIPER	2 EM 3
6	2017-08-30	09:40:00	102	36	38.7	1	NORMO	4 EM 3
6	2017-08-31	09:50:00	74	52	38.4	2	NORMO	3 EM 3
6	2017-09-01		70	42	38.6	2	NORMO	3 EM 3
6	2017-09-02		68	40	38.5	3	NORMO	3 EM 3
6	2017-09-03
6	2017-09-04	09:00:00	72	40	38.8	2	NORMO	4 EM 3
6	2017-09-05	10:15:00	84	46	38.5	2	NORMO	4 EM 3
6	2017-09-06	10:10:00	80	42	38.8	1	NORMO	5 EM 3
6	2017-09-07	08:00:00	72	40	38.4	2	NORMO	2 EM 3
6	2017-09-08	09:55:00	92	42	38.4	2	NORMO	5 EM 3
6	2017-09-09	09:55:00	84	40	38.3	2	NORMO	2 EM 3
6	2017-09-10		76	28	38.8	2	NORMO	3 EM 3
6	2017-09-11		62	34	38.5	2	NORMO	4 EM 3
6	2017-09-12		92	40	38.5	2	HIPER	3 EM 3
6	2017-09-13		82	48	38.8	2	NORMO	4 EM 3
6	2017-09-14
6	2017-09-15		94	40	38.8	2	NORMO	4 EM 3
7	Basal	12:00:00	110	40	38.1	3	NORMO	9 EM 5
7	2017-07-15	09:35:00	68	24		3	NORMO	3 EM 3
7	2017-07-16	09:40:00	76	16	38.9	1	NORMO	4 EM 3
7	2017-07-17	09:20:00	64	16	38.5	3	HIPO	2 EM 3
7	2017-07-18	10:00:00	80	20	39.2	3	HIPO	2 EM 3
7	2017-07-19	16:20:00	52	40		3	HIPO	2 EM 3
7	2017-07-20	17:00:00	72	24	40.2	2	HIPO	1 EM 3
7	2017-07-21	11:01:00	60	24	38.4	2	HIPO
7	2017-07-23		68	20	39.1	3	NORMO	3 EM 3
7	2017-07-24	09:35:00	60	15	39.1	3	HIPO	3 EM 3
7	2017-07-25	09:30:00	80	20	39.1	2	HIPO	2 EM 3
7	2017-07-26		80	16	39.3	2	NORMO	2 EM 3
7	2017-07-27	10:00:00	102	24	38.0	2	NORMO	1 EM 3
7	2017-07-28	10:00:00	60	20	38.4	3	NORMO	2 EM 3
7	2017-07-29	11:00:00	68	16	39.0	3	NORMO	2 EM 3
7	2017-07-30	09:30:00	60	24	38.4	2	NORMO	3 EM 3
7	2017-07-21	09:30:00	84	24	38.7	2	HIPO	5 EM 3
7	2017-08-01	07:50:00	78	28	38.8	3	HIPO	1 EM 3
7	2017-08-02	07:50:00	80	32	38.9	3	HIPO	1 EM 3
7	2017-08-03	08:10:00	78	32	38.4	3	HIPO
7	2017-08-04	08:20:00	68	32	38.5	2	NORMO	3 EM 3
7	2017-08-05	09:40:00	44	24	38.6	2	NORMO	2 EM 3
7	2017-08-06	10:15:00	68	24	38.3	3	HIPO	3 EM 3
7	2017-08-07	08:50:00	76	32	38.2	2	HIPO	3 EM 3
7	2017-08-08	09:30:00	100	26	38.8	2	NORMO	1 EM 3
7	2017-08-09	08:00:00	94	46	38.4	2	HIPO	3 EM 3
7	2017-08-10	10:00:00	76	26	39.9	2	NORMO	2 EM 3
7	2017-08-11	11:30:00	96	32	39.3	3	HIPO	2 EM 3
7	2017-08-12	09:50:00	60	32	38.8	3	HIPO	3 EM 3
7	2017-08-13	09:40:00	72	40	38.6	3	NORMO	2 EM 3
7	2017-08-14	09:30:00	80	36	38.6	2		4 EM 3
7	2017-08-15		80	28	38.9	2	HIPO	3 EM 3
7	2017-08-16	10:30:00	72	26	38.4	2	NORMO	1 EM 3
7	2017-08-18	09:10:00	82	30	38.5	3	NORMO	2 EM 3
7	2017-08-19		92	72	39.0	2	HIPER	3 EM 3
7	2017-08-20	10:10:00	80	72	38.6	2	NORMO	2 EM 3
7	2017-08-21	10:00:00	82	46	38.7	2	NORMO	4 EM 3
7	2017-08-22	09:50:00	80	32	38.6	2	NORMO	3 EM 3
7	2017-08-23	10:00:00	94	38	37.9	2	NORMO	4 EM 3
7	2017-08-24	10:05:00	88	32	38.4	2	NORMO	3 EM 3
7	2017-08-25	10:00:00	94	40	38.4	1	NORMO	2 EM 3
7	2017-08-26		80	48	38.6	2	HIPER	3 EM 3
7	2017-08-27	09:30:00	78	36	37.6	2	NORMO	2 EM 3
7	2017-08-28		88	44	38.8	3	HIPER	3 EM 3
7	2017-08-29	10:00:00	90	42	38.1	2	NORMO	4 EM 3
7	2017-08-30	10:10:00	72	38	38.3	2	NORMO	3 EM 3
7	2017-08-31	10:10:00	82	58	38.2	2	NORMO	3 EM 3
7	2017-09-01		72	30	38.1	2	NORMO	3 EM 3
7	2017-09-02		104	36	38.1	3	NORMO	2 EM 3
7	2017-09-03
7	2017-09-04	09:00:00	82	44	37.6	3	NORMO	3 EM 5
7	2017-09-05	09:55:00	92	40	38.5	2	NORMO	3 EM 3
7	2017-09-06	10:40:00	102	46	38.2	2	NORMO	3 EM 3
7	2017-09-07	08:00:00	88	44	37.9	2	NORMO	3 EM 3
7	2017-09-08	10:05:00	96	40	38.3	2	NORMO	4 EM 3
7	2017-09-09	09:30:00	84	36	38.2	2	NORMO	3 EM 3
7	2017-09-10		80	36	38.8	2	NORMO	3 EM 3
7	2017-09-11		88	32	39.0	2	NORMO	3 EM 3
7	2017-09-12		96	40	38.1	2	NORMO	3 EM 3
7	2017-09-13		97	38	38.6	2	NORMO	4 EM 3
7	2017-09-14
7	2017-09-15		100	64	38.6	2	NORMO	6 EM 3
7	2017-09-16		96	48	38.4	2	NORMO	4 EM 3
7	2017-09-17		92	45	38.4	3	NORMO	3 EM 3
7	2017-09-18		92	40	38.6	2	NORMO	2 EM 3
7	2017-09-19		94	50	38.3	2	NORMO	6 EM 3
7	2017-09-20		90	54	38.2	3	NORMO	5 EM 3
7	2017-09-21		80	32	39.2	2	NORMO	2 EM 3
7	2017-09-22		100	56	38.5	2	NORMO	6 EM 3
7	2017-09-23		84	40	38.4	2	NORMO	4 EM 3
7	2017-09-24		100	40	38.9	3	NORMO	3 EM 3
7	2017-09-25		105	40	39.5	2	NORMO	5 EM 3
7	2017-09-26		105	44	39.5	2	NORMO	6 EM 3
7	2017-09-27		100	32	39.5	2	NORMO	5 EM 3
7	2017-09-28		108	56	38.7	2	HIPO	2 EM 3
7	2017-09-29		82	40	38.8	2	NORMO	3 EM 3
7	2017-09-30		96	32	39.0	2	NORMO	3 EM 3
7	2017-10-01		92	36	38.3	2	NORMO	5 EM 3
7	2017-10-02		86	46	38.6	2	NORMO	5 EM 3
7	2017-10-03		92	44	38.3	2	HIPO	6 EM 3
7	2017-10-04		89	45	38.4		HIPO	6 EM 3
7	2017-10-05		88	46	38.5	2	HIPO	3 EM 3
7	2017-10-06		86	42	38.4	2	HIPO	6 EM 3
7	2017-10-07		80	32	37.8	3	NORMO	2 EM 3
7	2017-10-08		100	32	38.0	2	NORMO	2 EM 3
7	2017-10-09		105	44	39.5	2	NORMO	6 EM 3
7	2017-10-10		90	44	38.4	2	NORMO	5 EM 3
7	2017-10-11		90	54	38.4	2	NORMO	5 EM 3
7	2017-10-12		80	32	37.8	3	NORMO	2 EM 3
7	2017-10-13		96	28	38.8	2	HIPO	4 EM 3
7	2017-10-14		80	46	38.5	2	NORMO	4 EM 3
7	2017-10-15		90	46	38.7	2	NORMO	5 EM 3
7	2017-10-16		84	36	38.9	2	NORMO	4 EM 3
7

## Sheet: Blood Biochemistry
Calf	Time	TGP (U/L)	Amilase¹ (U/L)	TGO/L)	Creatinine³ (mg/dL)	GGT¹ (U/L)	Glucose (mg/dL)	Proteínas totais² (g/dL)	Albumine² (g/dL)	Globuline (mg/dL)	A:G rate	Ureia¹ (mg/dL)	Alcalina Fosfatase ¹ (U/L)
1	T 0	18.09	-	54.8	0.69	14.12	46.6	6.82	2.9	3.8	0.36	22.92	69.27
1	T 15	14.82	-	52.91	0.76	15.83	72.3	7.09	3.14	3.95	0.79	23.94	76.57
1	T30	21.07		52.8	0.78	23.06		9.01	3.15	4.01	0.61	24.27	77.58
1	T45	23.73	-	55.3	0.77	23.17	82	9.02	3.47	5.55	0.62	24.27	130.96
1	T60	23.76	-	50.6	0.59	23.05	69.7	8.03	3.39	4.64	0.73	25.57	101.33
2	T 0	12.1	-	50.8	0.59	12.8	98.3	7.5	2.9	4.1	0.36	21.81	120.08
2	T 15	13.1	-	51.63	0.66	14.16	97.9	8.55	3.1	5.45	0.56	22.95	121.09
2	T30	15.02		50.2	0.7	15.15		9.45	3.5	6.21	0.48	20.5	150.85
2	T45	17.06	-	43.3	0.77	16.91	86	10.62	3.45	7.17	0.48	19.19	178.83
2	T60	16.56	-	40.1	0.73	16.84	92.9	9.52	3.07	6.45	0.47	20.83	175.47
3	T 0	11.01		52.43	1	14.32	73	5.4	2.5	3.2	1.17	39.16	111.82
3	T 15	12.47	-	55.42	1	14.44	73.1	5.6	3.02	2.58	1.17	39.15	110.91
3	T30	18.35		50.41	1	18.47	74.1	7.88	3.4	4.1	0.82	42.18	120.13
3	T45	21.5	-	46	0.88	21.51	72.2	8.99	3.74	5.25	0.71	59.91	199.12
3	T60	18.36	-	42	1.37	18.04	88.1	7.52	3.43	4.09	0.83	42.95	194.77
4	T 0	11.02		39.72	0.62	12.81		7.86	3.33	4.23	0.75	31.2	101.52
4	T 15	12.45	-	40.77	0.65	14.82	80.5	7.89	3.4	4.49	0.75	31.27	101.57
4	T30	14.18		39.8	0.65	18.83		10.07	3.33	6.68	0.52	23.47	110.83
4	T45	15.93	-	37.7	0.65	22.88	80.2	11.05	3.33	7.72	0.43	23.47	11.49
4	T60	14.08	-	33.6	0.69	21.26	81	10.85	3.17	7.68	0.41	25.7	97.03
5	T 0	18.01		52.18	0.22	17.1	73.6	7.33	3.06	4.22	0.7	31.1	73.72
5	T 15	19		54.17	0.33	16.21	59.5	7.39	3.06	4.33	0.7	31.2	73.73
5	T30	22.01		52.21	0.55	20.21	76.5	8.65	4.4	5.33	0.46	33.6	81.33
5	T45	23.89	-	48.9	0.59	23.46	77.3	9.67	3.4	6.27	0.54	33.67	84.34
5	T60	23.41	-	52.5	0.22	20.36	66.6	8.47	3.47	5	0.69	36.95	90.23
7	T-0	17.09	-	54.8	0.59	48.8	46.6	10.82	2.9	7.92	0.36	36.95	69.27
7	T-15	17.66	-	53.4	0.59	34.33	56.8	9.27	3	6.27	0.47	33.42	78.74
7	T-30	22.02	-	75.24	0.64	32.6	53.9	7.88	2.91	4.97	-	40.6	97
7	T-45	18.3	-	41.55	0.84	22.37	55.6	8.76	3.19	-	-	40.6	67.78
7	T-60	20.34	12.86	42.23	0.79	23.08	56.1	9.08	3.42	5.66	-	47.4	91.23

## Sheet: Blood Count
Calves	Analyses	T 0 - jul	2017-07-19	2017-07-26	2017-08-02	2017-08-09	2017-08-16	2017-08-23	2017-08-30	2017-09-06
1	Red Blood cells (10^6)	5.54	7.02	6.8	7.4	7.15	9.58	7.87	7.53	7.69
	Hemtocrit %	18.7	22	28	30	30	30	32	30	31
	Leucocytes	12570	9100	11850	5950	10900	6000	9250	8750	10700
	PMN	1709	4914	5451	2856	3161	1140	2312.5	3587.5	4494
	Linfocytes	6699	3458	5214	2618	7805	4380	6012.5	4200	4922
	Eosinophils	25	91	118.5	59.5	109	159	230	350	428
	Monocytes	4135	637	1666.5	416.5	545	480	925	612.5	856
	platelets (10^6)	276000	297800	148400	116200	94400	98400	109600	101300	99600
	Fibrinogen	400	600	1400	1200	1000	800	800	600	400
	Total Protein	8.2	7.2	7.4	7.2	7.8	6.8	7.2	7.2	7.2
	Hemoglobin	6.6	8.1	10.1	11.4	11.2	10.7	10.8	10.6	10.3
2	Red Blood cells (10^6)	6.76	7.61	6.77	7.1	7.04	6.63	7.17	7.06	7
	Hemtocrit %	24.3	24	28	27	29	26	30	28	27
	Leucocytes	20950	19300	9050	11800	16450	13500	16100	14200	14100
	PMN	6075	12159	1810	3894	6744.5	3375	6762	5680	5670
	Linfocytes	8170	5018	6787	6962	8883	9450	7889	7100	7100
	Eosinophils	146	0	271.5	236	329	135	322	568	572
	Monocytes	6285	2123	181	708	493.5	540	1127	852	850
	platelets (10^6)	560000	201200	195000	107800	98200	86400	117000	98600	97200
	Fibrinogen	9	8.4	9.2	8	7.2	7.4	8	7.6	7.6
	Total Protein	500	1000	1600	1000	600	600	600	600	600
	Hemoglobin	7.9	9.77	9.88	10.4	10.2	8.79	9.95	10.3	10.2
3	Red Blood cells (10^6)	7.59	6.54	6.94	6.25	6.54	5.19	5.59	6.81	7.26
	Hemtocrit %	27	20	25	25	32	20	26	27	30
	Leucocytes	6670	5850	4750	5150	5700	7550	7250	6350	8450
	PMN	1334	2457	1520	618	1083	3850.5	1957.5	2222.5	3549
	Linfocytes	4802	3217.5	2945	4429	4389	3322	4495	3619.5	3887
	Basophils	0	0	47.5	0	0	0	0	0	84.5
	Eosinophils	6	0	47.5	0	0	0	0	190.5	253.5
	Monocytes	466	175.5	190	103	228	377.5	797.5	317.5	676
	platelets (10^6)	475000	169200	233600	119600	54000	50200	96000	98400	99700
	Fibrinogen	6.2	5	6	5.6	5.8	5.8	7.4	7.2	7.2
	Total Protein	500	1000	1000	1000	800	800	400	600	400
	Hemoglobin	8.4	7	8	9.14	10.8	6.87	9.08	9.06	9.57
4	Red Blood cells (10^6)	10.03	6.39	5.5	3.42	2.77	8.44	4.58	5.67	6.05
	Hemtocrit %	32.9	32	23	11	20	29	24	27	29
	Leucocytes	19050	13000	8400	7050	5750	9250	6200	10250	9850
	PMN	3619	7410	1764	2115	1322.5	1295	3224	4612.5	4137
	Linfocytes	9334	4940	6300	4935	4255	7492.5	2542	4612.5	4629.5
	Basophils	57	0	252	0	0	0	124	307.5	295.5
	Eosinophils	5.715	650	84	0	17.5	462.5	248	717.5	788
	Monocytes	0	0	0	0	0	0	62	0	0
	platelets (10^6)	681000	91800	85400	81200	111600	133000	124000	116000	99400
	Fibrinogen	8	7.4	8.2	7.6	7.4	7.8	8	7.6	7.2
	Total Protein	400	600	600	800	600	800	400	800	600
	Hemoglobin	11.8	10.1	7.77	6.24	6.84	10.9	8.71	9.46	9.48
5	Red Blood cells (10^6)	8.82	8.69	7.82	8.36	4.95	2.04	4.21	7.06	8.54
	Hemtocrit %	28.1	33	39	30	24	19	27	29	31
	Leucocytes	15840	14300	13850	14200	8800	17850	12850	13550	11750
	PMN	4752	3003	2631.5	3834	3168	4998	3726.5	4742.5	5170
	Linfocytes	4593	10296	9972	1082	5192	12316.5	8352.5	7723.5	5522.5
	Eosinophils	15	143	0	142	0	0	128.5	135.5	235
	Monocytes	6336	858	1246.5	142	440	575.5	642.5	948.5	822.5
	platelets (10^6)	587000	94800	97000	76200	12200	102200	105200	98000	100600
	Fibrinogen	7.8	6.6	8	6.6	6.2	6.2	7	7.2	7.2
	Total Protein	500	1000	1000	800	600	600	600	600	600
	Hemoglobin	10	11.5	12.5	12.3	7.59	5.23	8.56	10.6	9.7
6	Red Blood cells (10^6)	5.21	7.64	7.13	7.78	5.55	6.65	8.24	7.96	0	OUT
	Hemtocrit %	16.2	30	34	27	25	30	31	30	0
	Leucocytes	12260	11000	3950	9050	7000	9700	8100	9750	0
	PMN	3800	4950	1303.5	2443.5	2170	3589	3321	3510	0
	Linfocytes	5884	5390	2409.5	6335	4130	5335	3807	5265	0
	Eosinophils	122	330	118.5	90.5	420	291	243	292.5	0
	Monocytes	2329	330	118.5	181	280	485	729	682.5	0
	platelets (10^6)	587000	1452000	120600	68000	82800	113600	149600	126000	0
	Fibrinogen	6.7	7	8.2	7.4	7.2	7.4	8	7.6	0
	Total Protein	400	400	400	600	800	600	400	600	0
	Hemoglobin	6	0	11.3	10.3	9.49	10.7	12.5	10.4	0
		T-0 16/ago	2018-08-23	2018-08-30	2018-08-06	2018-08-13	2018-09-20	2018-09-27	2018-10-04	2018-10-11
7	Red Blood cells (10^6)	4.77	5.88	5.36	7.29	7.84	6.12	3.24	3.63	4.49
	Hemtocrit %	23	27	28	28	29	33	20	22	25
	Leucocytes	4750	8100	9300	10250	9100	8480	8740	6440	7300
	PMN	2945	4698	3813	4612.5	4186	3900.8	3845.6	1803	2336
	Linfocytes	1472.5	2673	4743	5125	4459	3985.6	4020.4	4379	4307
	Eosinophils	95	0	186	0	91	169.6	262.2	65	146
	Monocytes	237.5	729	558	512.5	364	424	786.6	193	511
	platelets (10^6)	144800	186800	136000	115000	98700	95300	87400	102000	160800
	Fibrinogen	7.2	8	7.8	7.4	7.6	6.8	7.6	7.2	8
	Total Protein	1200	600	600	800	800	1000	800	400	200
	Hemoglobin	8.07	9.55	8.87	9.22	9.47	9.93	4.58	6.54	7.62

## Sheet: US Post operative evaluation
Time	Calf	Incision	Focus	Nail		Incision wound
T 15	1	2	52 mm	1		0	No clinical changes
T 15	3	2	18 mm	2		1	Discreet irregularity in the incision line
T 15	4	2	53 mm	1		2	Moderate seroma
T 15	5	3	55 mm	1		3	Severe seroma
T 15	6	3	32 mm	1
T 15	7	2	26 mm	1		Fracture line
T 30	1	2	C. O. B. I	1
T 30	3	2	C.O. B	2		Nail insertion wound
T 30	4	2	C. C. B. I	1		0	No clinical changes
T 30	5	3	C.O. B	1		1	Leve irregularidade ao redor da linha de sutura
T 30	6	Out				2	Leve acúmulo de líquido
T 30	7	2	C. O. B	1		3	Severo acúmulo de líquido com seroma
T 45	1	0	C.O. B	3
T 45	3	1	C.O. B	1		*	Well developed callus
T 45	4	Fluid	C.O. B	3
T 45	5	1	C.O. B	1
T 45	7	1	C. O.B	1
T 60	1	2	C.O. B	3
T 60	3	1	C.O. B	1
T 60	4	1	C.O. B	3
T 60	5	1	C.O. B	1
T 60	7	1	C. O.B	1
